# Supplementary material for: Microtransplantation Improves the Outcome of Older Patients With Newly Diagnosed Acute Myeloid Leukaemia: a Single-centre Study With Long-term Follow-up
Source: Research Square preprint supplement (doi:10.21203/rs.3.rs-1212388/v1), 2022-01-06
Supplement: Supplementary file 1 [file f44bed67dab64485080211d7.xls]

## Sheet: Sheet2
Table 1. Characteristics of patients and donors
	All patients (n = 26)	60-70 years (n = 17)	>70 years (n = 9)	p-value
Patient sex				0.418
Female, n (%)	17 (65.4)	10 (58.8)	7 (77.8)
Male, n (%)	9 (34.6)	7 (41.2)	2 (22.2)
Donor sex
Female, n (%)	9 (34.6)	5 (29.4)	4 (44.4)	0.667
Male, n (%)	17 (65.4)	12 (70.6)	5 (55.6)
Donor age (years), median (range)	36.5 (27-54)	34 (27-45)	44 (36-54)	0.0006
Donor/Patient sex				0.205
Female to female, n (%)	6 (23.1)	2 (11.8)	4 (44.5)
Female to male, n (%)	3 (11.5)	3 (17.6)	0
Male to female, n (%)	11(42.3)	8 (47.1)	3 (33.3)
Male to male, n (%)	6 (23.1)	4 (23.5)	2 (22.2)
Relation to donor
related, n(%)	22(84.6)	13(76.5)	9(100)	0.114
Unrelated, n(%)	4(15.4)	4(23.5)	0
Donor/recipient with HLA mismatched loci
5/10, n(%)	20 (76.9)	12 (70.6)	8 (88.9)	0.461
6/10, n(%)	3 (11.5)	3 (17.6)	0
7/10, n(%)	2 (7.7)	1 (5.9)	1 (11.1)
8/10, n(%)	1 (3.8)	1 (5.9)	0
Disease risk group				0.067
Standard, n (%)	9 (34.6)	8 (47.1)	1 (11.1)
High, n (%)	17 (65.4)	9 (52.9)	8 (88.9)
Courses of MST				0.0008
＞3, n (%)	17 (65.4)	15 (88.2)	2 (22.2)
1-3, n (%)	9 (34.6)	2 (11.8)	7 (77.8)
Table 2. Outcomes of Patients
	All patients (n = 26)	60-70 (n = 17)	>70 (n = 9)	p-value
MNC x108/kg, median (range)	3.54 (1.86-5.2)	3.5 (1.86-5.2)	3.91 (2.05-4.45)	0.688
CD34+ cells x106/kg, median (range)	1.98 (1.04-4.29)	1.96 (1.04-4.02)	2.02 (1.14-4.29)	0.985
CD3+ cells x108/kg, median (range)	0.73 (0.51-1.7)	0.71 (0.52-1.7)	0.87 (0.51-1.44)	0.654
Induction regimen, MA/IA, n (%)	26 (100)	17 (100)	9 (100)	0.999
Overall CR, n (%)	22 (84.6)	16 (94.1)	6 (66.7)	0.104
Standard risk, n (%)	9 (100)	8 (100)	1 (100)	0.999
High risk, n (%)	13 (76.5)	8 (88.9)	5 (62.5)	0.294
Total death, n (%)	15 (57.7)	6 (35.3)	9 (100)	0.002
Early death, n (%)	4 (15.4)	1 (5.9)	3 (33.3)	0.104
Causes of death
Relapse, n (%)	8 (30.8)	3 (17.6)	5 (55.6)	0.078
Severe infection, n (%)	4 (15.4)	0	4 (44.4)	0.008
Organ failure, n (%)	3 (11.5)	3 (17.6)	0	0.28
OS, n (%)	10 (41.3)	10 (63.1)	0	<0.0001
1-year OS, n (%)	17 (65.4)	14 (82.4)	3 (33.3)
3-year OS, n (%)	8 (41.3)	8 (63.1)	0
5-year OS, n (%)	5 (41.3)	5 (63.1)	0
LFS, n (%)	10 (52.4)	10 (73.3)	0	<0.0001
1-year LFS, n (%)	15 (71.4)	14 (86.7)	1 (16.7)
3-year LFS, n (%)	6 (52.4)	6 (73.3)	0
5-year LFS, n (%)	5 (52.4)	5 (73.3)	0
Relapse, n (%)	8 (38.5)	3 (21.0)	5 (83.3)	0.0002
1-year relapse, n (%)	6 (28.2)	1(6.7)	5 (83.3)
3-year relapse, n (%)	8 (38.5)	3 (21)	5 (83.3)
5-year relapse, n (%)	8 (38.5)	3 (21)	5 (83.3)
NRM, n(%)	7 (30)	3 (18.1)	4 (100)	0.0296
100-day NRM, n (%)	4 (11.5)	1 (5.9)	3 (33.3)
1-year NRM, n (%)	5 (19.2)	2 (11.8)	3 (33.3)
2-year NRM, n (%)	7 (30)	3 (18.1)	4 (100)
3-year NRM, n (%)	7 (30)	3 (18.1)	4 (100)
5-year NRM, n (%)	7 (30)	3 (18.1)	4 (100)
